# Supplementary material
Source: HighWire-hosted journal article supplement (https://ebmtp.com/highwire/filestream/161054/field_highwire_adjunct_files/0/Vega_1235.pdf)
Supplement: Vega_1235.pdf [file Vega_1235.pdf]

# 胸腺腫関連の神経ミオトニーと重症筋無力症 合併におけるネトリン-1受容体抗体

Netrin-1 receptor antibodies in thymoma-associated neuromyotonia with myasthenia gravis

Estefanía Torres-Vega, BSc\*;  
Nuria Mancheño, MD;  
Arantxa Cebrián-Silla, BSc;  
Vicente Herranz-Pérez, PhD;  
María J. Chumillas, MD;  
Germán Moris, MD;  
Bastien Joubert, MD;  
Jérôme Honnorat, MD, PhD;  
Teresa Sevilla, MD\*;  
Juan J. Vílchez, MD\*;  
Josep Dalmau, MD;  
Francesc Graus, MD;  
José Manuel García-Verdugo,  
PhD;  
Luis Bataller, MD\*

\*Laboratorio de Neurología,  
Instituto de Investigación  
Sanitaria La Fe, Hospital  
Universitario y Politécnico  
La Fe, CIBERER,  
Valencia, Spain

Correspondence to Dr. Bataller:  
bataller\_lui@gva.es

**目的:** 神経ミオトニー患者における細胞表面抗体を同定し、主な臨床的意義について述べる。

**方法:** 胸腺腫関連の神経ミオトニーと重症筋無力症を合併した患者3例の血清を用い、既報の方法に従い免疫沈降法を行い、神経細胞表面抗原の特徴を明らかにした。免疫沈降した蛋白質に対する抗体の臨床的重要性については、患者98例(神経ミオトニー46例、重症筋無力症52例、胸腺腫42例、33例は合併症例)と対照被験者219例(他の神経疾患、癌および健常者)の血清を用い評価した。

**結果:** 免疫沈降法により、3つの標的抗原、すなわち、ネトリン-1受容体のDDC (deleted in colorectal carcinoma) およびUNC5A (uncoordinated-5A), Caspr2 (contactin-associated protein-like 2) が同定された。これらの抗原に対する細胞を用いた分析では、検討した患者のうち9例がネトリン-1受容体抗体陽性(7例はCaspr2抗体も陽性)、5例がCaspr2抗体のみ陽性であることが明らかとなった。対照被験者219例では、わずか1例がCaspr2抗体陽性であり、この患者には再発性脊髄炎の既往があった。神経ミオトニー、重症筋無力症、あるいは両者をもつ患者では、ネトリン-1受容体抗体またはCaspr2抗体の存在により、胸腺腫の存在が予測された( $p < 0.05$ )。Caspr2抗体とネトリン-1受容体抗体の併存は、胸腺腫、重症筋無力症および神経ミオトニーの併存(しばしばモルヴァン症候群を伴う)と関連した( $p = 0.009$ )。DCC, UNC5A, Caspr2タンパクの発現は、胸腺腫(3例)と正常胸腺のパラフィン包埋標本で実証された。

**結論:** ネトリン-1受容体(DDCおよびUNC5A)抗体とCaspr2抗体はしばしば併存し、神経ミオトニーと重症筋無力症を合併した患者の胸腺腫の存在に関連している。

**エビデンスの分類:** 本研究は、ネトリン-1受容体抗体陽性により胸腺腫の存在を特定できる(感度21.4%, 特異度100%)という、クラスIIIのエビデンスを提供する。

Neurology® 2017; 88: 1235-1242

図1 本研究のフローチャート

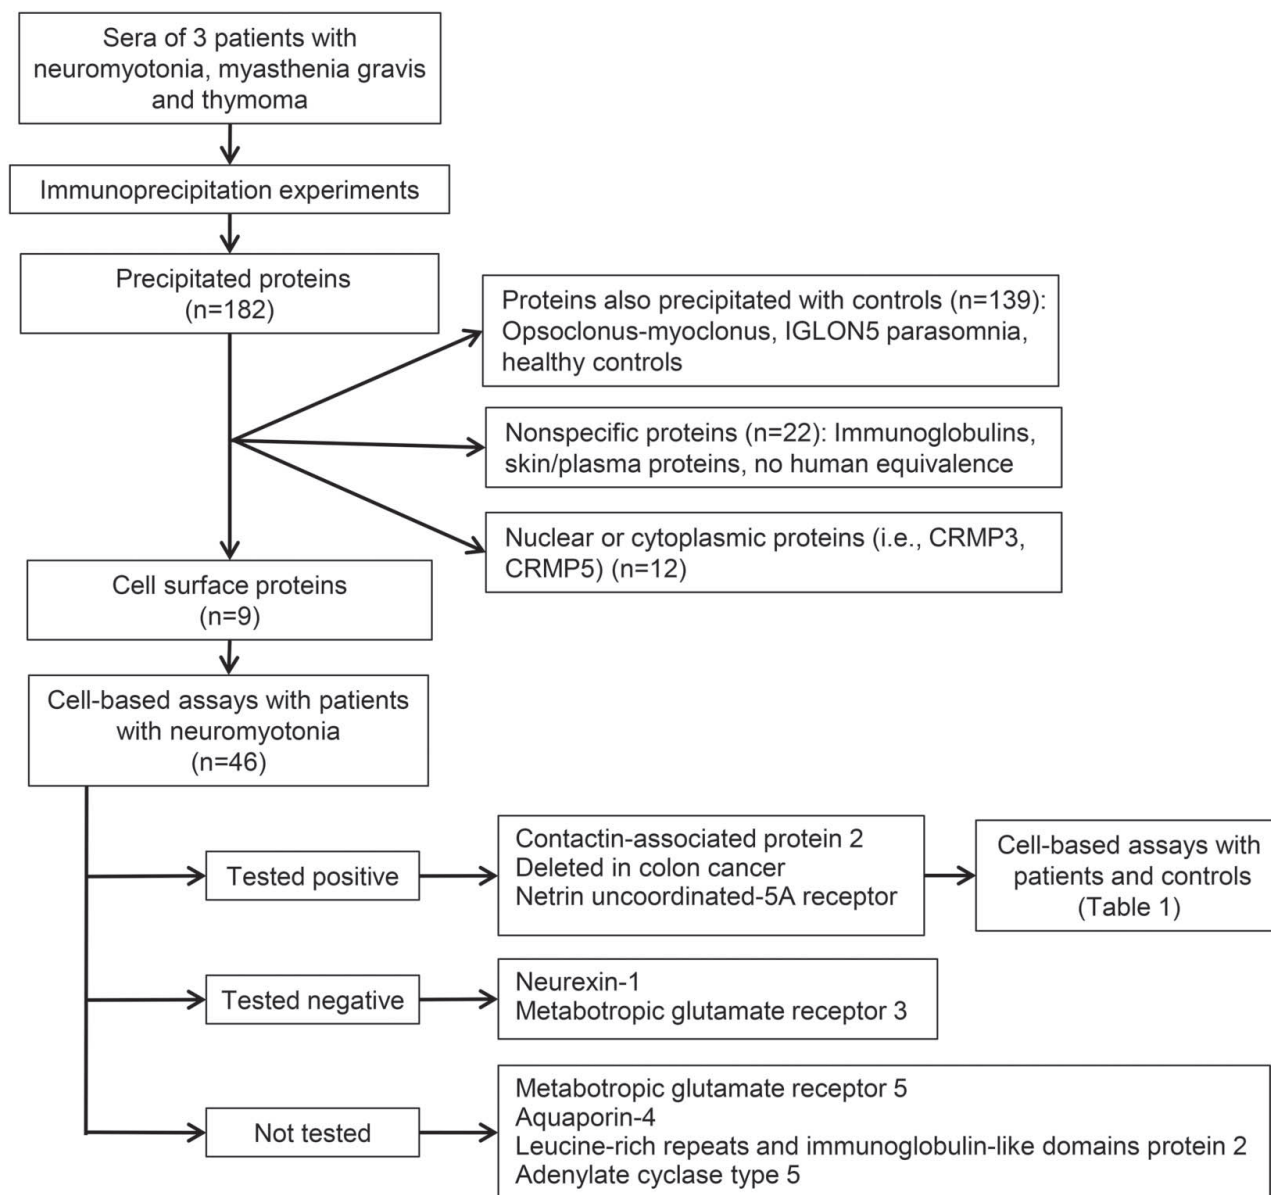

CRMP3=コラプシン反応媒介タンパク質3, CRMP5=コラプシン反応媒介タンパク質5
